# Supplementary figures and images for: Origin and Possible Genetic Recombination of the Middle East Respiratory Syndrome Coronavirus from the First Imported Case in China: Phylogenetics and Coalescence Analysis
Source: PubMed Central journal article supplement — mBio. 2015 Sep 8;6(5):e01280-15. doi: 10.1128/mBio.01280-15 (PMC4600111; doi:10.1128/mbio.01280-15), 2015-09-08

ORF1a

ORF1b

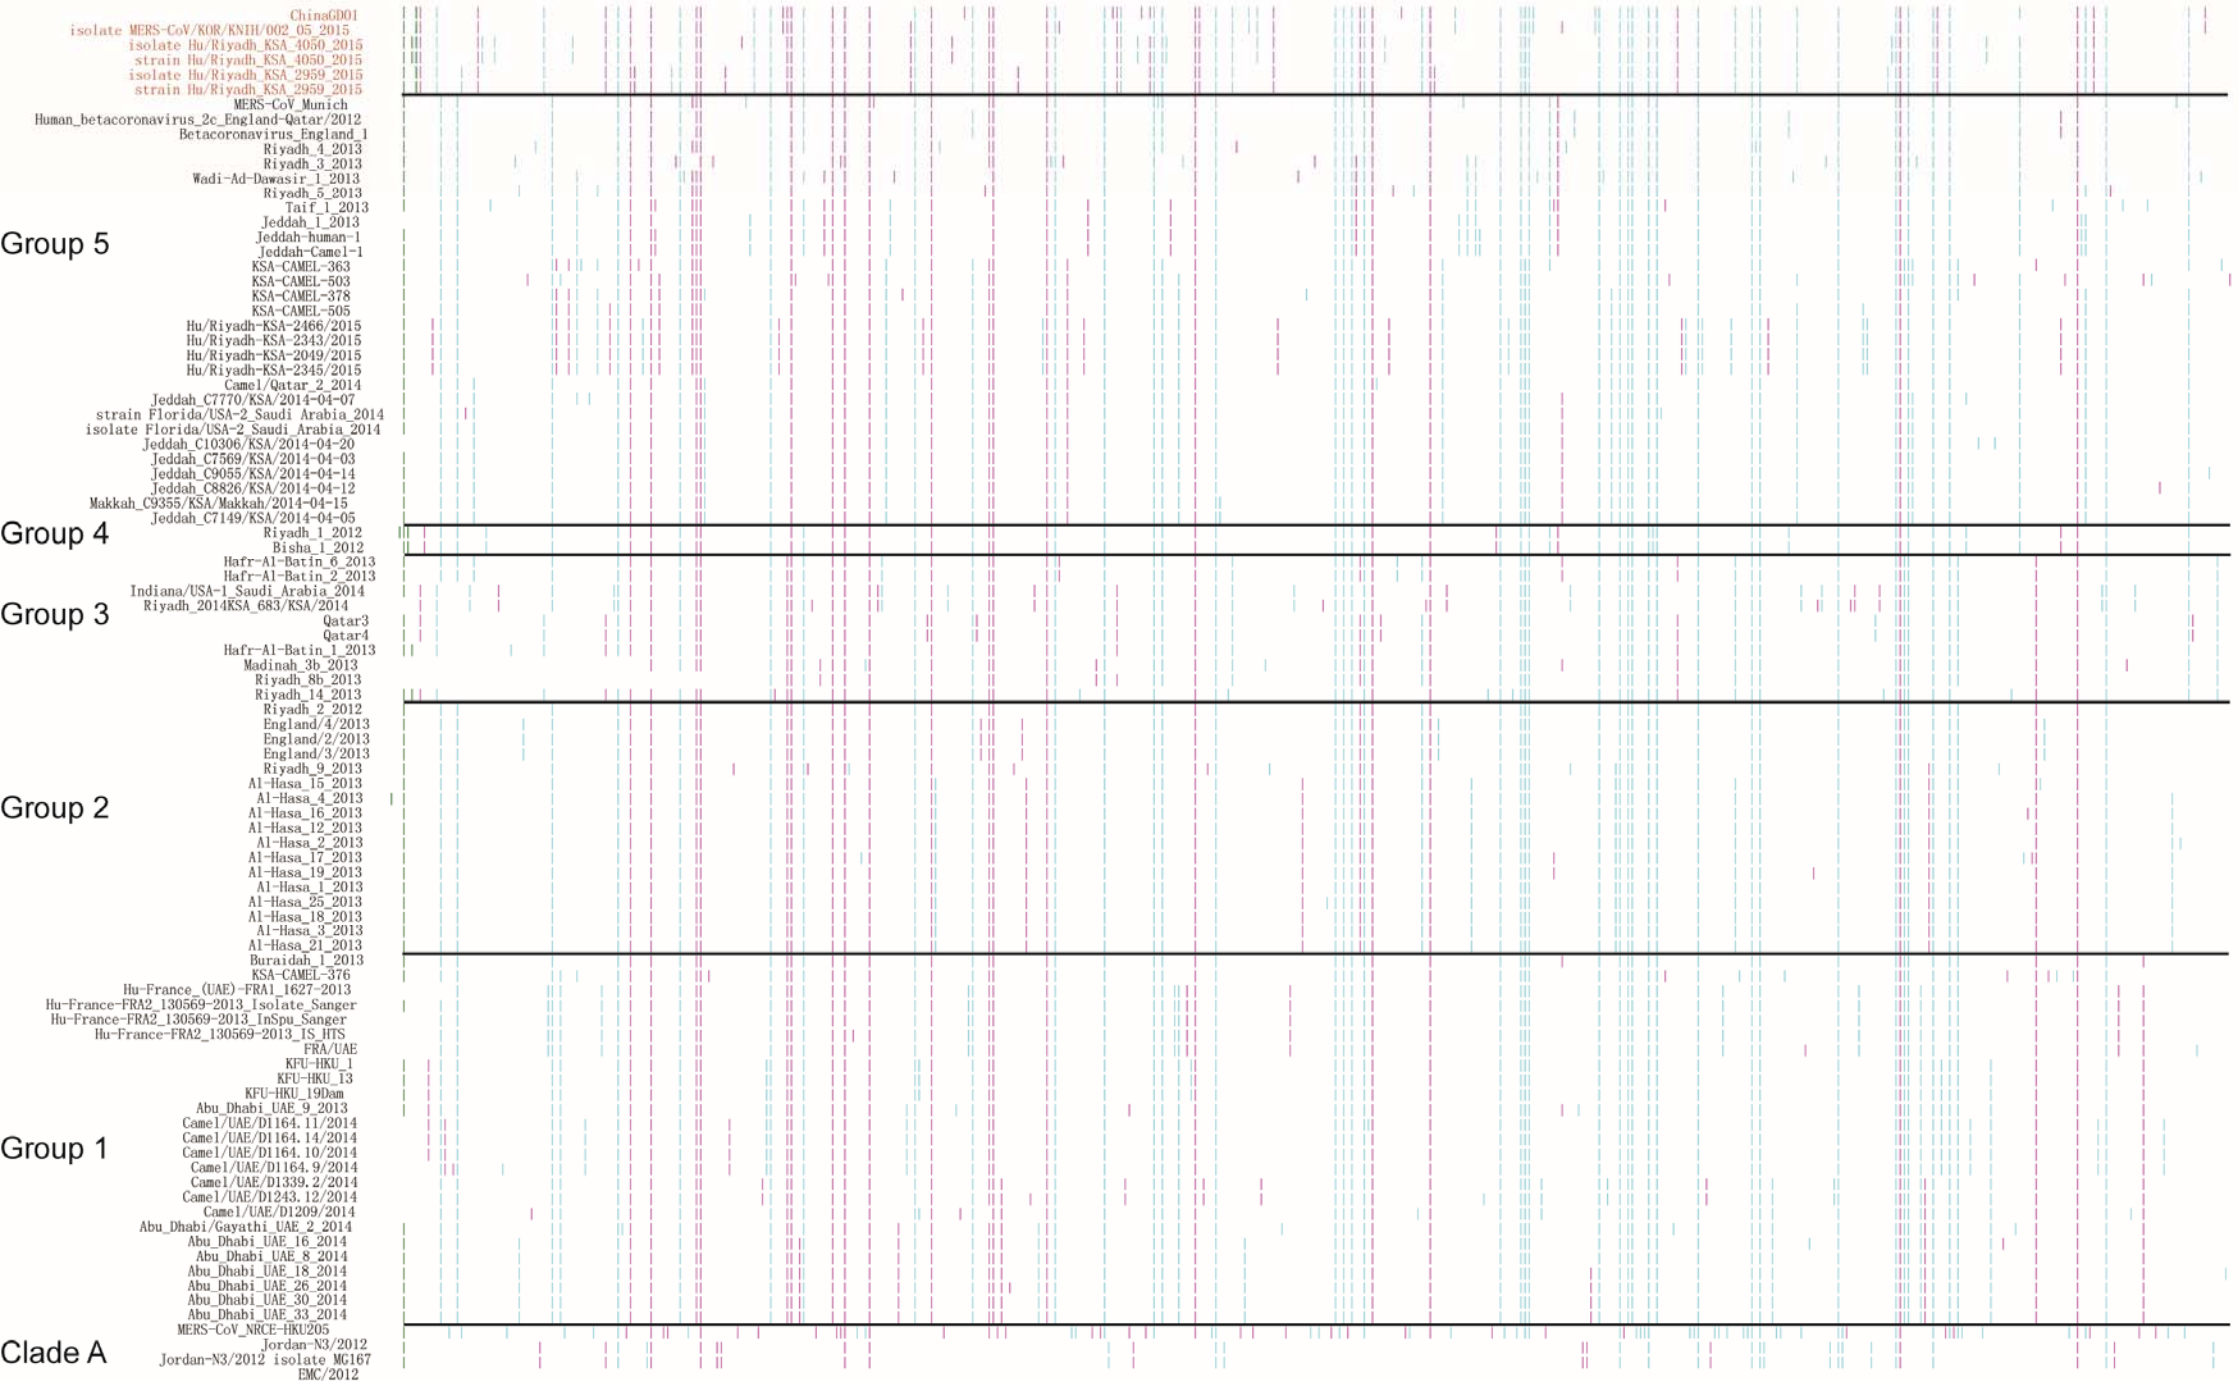

Supplement: mbo004152442sf1.pdf [file mbo004152442sf1.pdf]

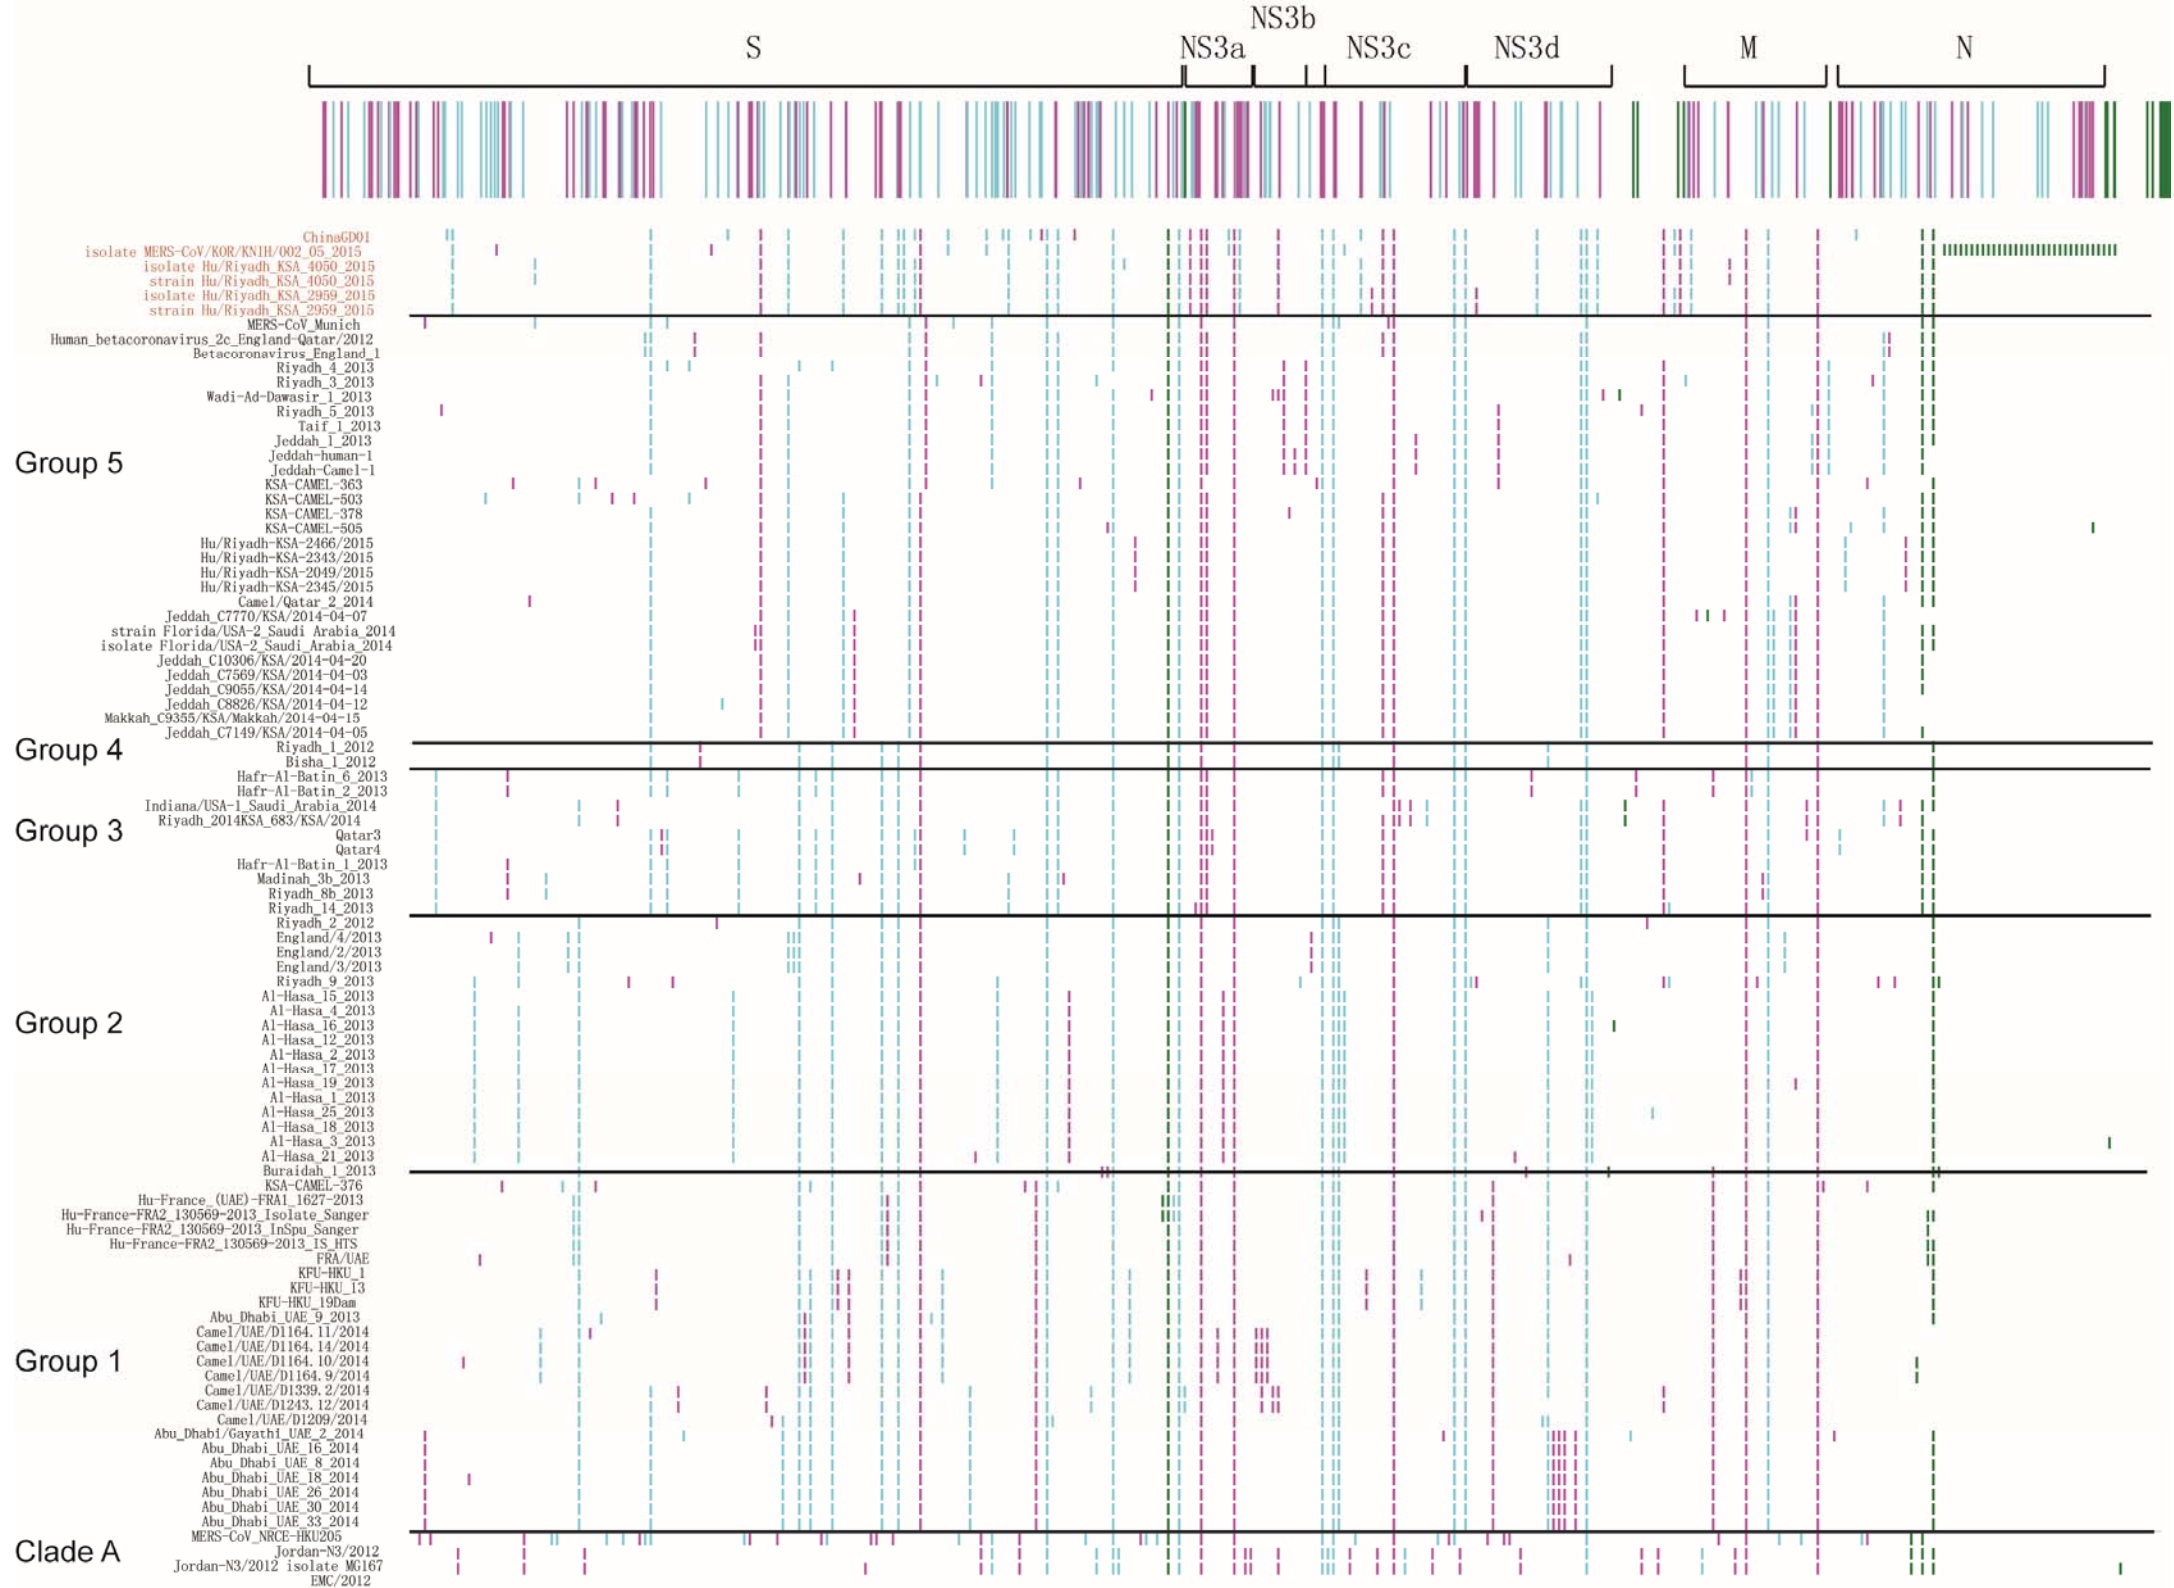

Supplement: mbo004152442sf2.pdf [file mbo004152442sf2.pdf]
